# Supplementary material for: We should be using nonlinear indices when relating heart-rate dynamics to cognition and mood
Source: PubMed Central journal article supplement (PMC4643265; doi:10.1038/srep16619), 2015-11-13
Supplement: srep16619-s1.pdf [file srep16619-s1.pdf]

**We should be using nonlinear indices when relating heart-  
rate dynamics to cognition and mood.**

**SUPPLEMENTARY INFORMATION**

**Hayley Young and David Benton**

### **S1A. Calculation of sample entropy**

First, a set of length  $m$  vectors  $u_j$  is formed

$$u_j = (RR_j, RR_{j+1}, \dots, RR_{j+m-1}), \quad j = 1, 2, \dots, N - m + 1 \quad (1)$$

where  $m$  is the embedding dimension and  $N$  is the number of measured RR intervals. The distance between these vectors is defined as the maximum absolute difference between the corresponding elements:

$$d(u_j, u_k) = \max \{ |RR_{j+n} - RR_{k+n}| \mid n = 0, \dots, m - 1 \}. \quad (2)$$

For each  $u_j$  the relative number of vectors  $u_k$  for which  $d(u_j, u_k) \leq r$  is calculated. This index is denoted with  $C_j^m(r)$  and can be written as:

$$C_j^m(r) = \frac{\text{nbr of } \{u_k \mid d(u_j, u_k) \leq r\}}{N - m} \quad \forall k \neq j. \quad (3)$$

The values of  $C_j^m(r)$  are averaged to yield:

$$C^m(r) = \frac{1}{N - m + 1} \sum_{j=1}^{N-m+1} C_j^m(r) \quad (4)$$

Finally, sample entropy is calculated as follows:

$$\text{SampEn}(m, r, N) = \ln(C^m(r)/C^{m+1}(r)). \quad (5)$$

**S1B. Visual illustration of the calculation of sample entropy.**

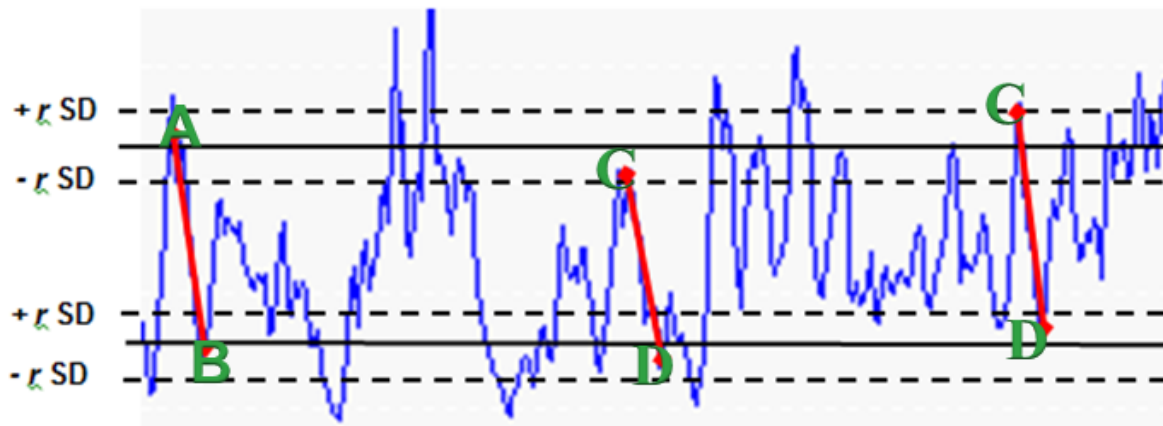

For a two-dimensional vector AB, the tolerance level  $r$  is represented by dashed lines around point A and B respectively, with width of  $2r \cdot SD$ . Then all vectors, for example CD, whose first and second points (respectively C and D) are within the tolerance ranges of A and B (e.g.  $\pm 2r \cdot SD$ ), are counted to measure, within a tolerance level  $r$ , the regularity of patterns similar to a given pattern of AB. For Approximate Entropy this would be a count of 3 but for Sample Entropy this would be a count of 2. This is because Sample Entropy does not include self-matches and therefore the count is always one less than with Approximate Entropy.

### S2A. Detrended fluctuation analysis.

The correlation is extracted for different time scales. First, the RR interval time series is integrated:

$$y(k) = \sum_{j=1}^k (RR_j - \overline{RR}), \quad k = 1, \dots, N \quad (6)$$

where  $\overline{RR}$  is the average RR interval. Next, the integrated series is divided into segments of equal length  $n$ . Within each segment, a least squares line is fitted into the data. Let  $y_n(k)$  denote these regression lines. Next the integrated series  $y(k)$  is detrended by subtracting the local trend within each segment and the root-mean-square fluctuation of this integrated and detrended time series is calculated by:

$$F(n) = \sqrt{\frac{1}{N} \sum_{k=1}^N (y(k) - y_n(k))^2}. \quad (7)$$

This computation is repeated over different segment lengths to yield the index  $F(n)$  as a function of segment length  $n$ . Typically  $F(n)$  increases with segment length. A linear relationship on a double log graph indicates presence of fractal scaling and the fluctuations can be characterized by scaling exponent  $\alpha$  (the slope of the regression line relating  $\log F(n)$  to  $\log n$  (S2B)).

**S2B.** A double log plot of the index  $F(n)$  as a function of segment length  $n$ .  $\alpha_1$  and  $\alpha_2$  are the short term and long term fluctuation slopes, respectively. Data shown are taken from a female participant in the present study for illustration purposes.

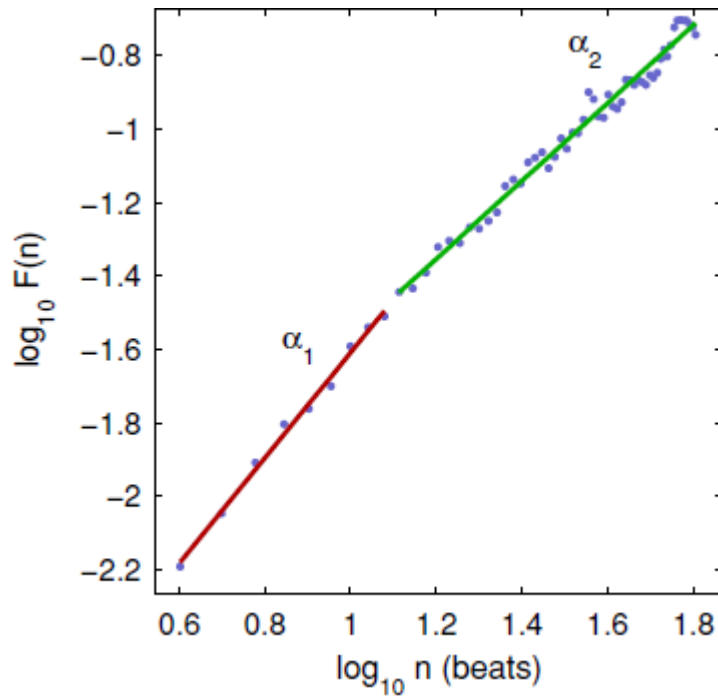

**Table S3. False discovery rate procedure.**

| RANK(j) | P - VALUE | $(j/m) \times \delta$ | REJECT $H_0$ ? |
|---------|-----------|-----------------------|----------------|
| 1       | 0.003     | 0.003                 | 1              |
| 2       | 0.004     | 0.004                 | 1              |
| 3       | 0.006     | 0.006                 | 1              |
| 4       | 0.007     | 0.008                 | 1              |
| 5       | 0.01      | 0.01                  | 1              |
| 6       | 0.01      | 0.01                  | 1              |
| 7       | 0.01      | 0.01                  | 1              |
| 8       | 0.03      | 0.01                  | 0              |
| 9       | 0.04      | 0.01                  | 0              |
| 10      | 0.04      | 0.02                  | 0              |
| 11      | 0.05      | 0.02                  | 0              |
| 12      | 0.05      | 0.02                  | 0              |
| 13      | 0.06      | 0.02                  | 0              |
| 14      | 0.12      | 0.02                  | 0              |
| 15      | 0.15      | 0.03                  | 0              |
| 16      | 0.19      | 0.03                  | 0              |
| 17      | 0.24      | 0.03                  | 0              |
| 18      | 0.25      | 0.03                  | 0              |
| 19      | 0.32      | 0.03                  | 0              |
| 20      | 0.35      | 0.04                  | 0              |
| 21      | 0.47      | 0.04                  | 0              |
| 22      | 0.49      | 0.04                  | 0              |
| 23      | 0.53      | 0.04                  | 0              |
| 24      | 0.98      | 0.05                  | 0              |

**Table S4. Baseline data for males and females.** Data are mean (SD). Independent *t* tests found no significant differences between males and females on any of the HR indices.

|                              | MALES        | FEMALES      |
|------------------------------|--------------|--------------|
| <b>R-R interval (ms)</b>     | 833.0(122.9) | 796.3(100.6) |
| <b>SDNN (ms)</b>             | 69.6(25.4)   | 69.0(26.4)   |
| <b>LF power (nu)</b>         | 57.7(14.7)   | 62.7(16.7)   |
| <b>HF power (nu)</b>         | 42.1(14.7)   | 37.2(16.6)   |
| <b>LF/HF ratio</b>           | 1.8(0.9)     | 2.2(1.3)     |
| <b>RPmax (beats)</b>         | 208.1(96.6)  | 251.8(106.8) |
| <b>RPrec (%)</b>             | 35.7(9.8)    | 35.6(7.0)    |
| <b>RPdet (%)</b>             | 98.2(1.3)    | 98.5(0.8)    |
| <b>RPshen</b>                | 3.2(0.3)     | 3.2(0.2)     |
| <b><math>\alpha 1</math></b> | 1.0(0.2)     | 1.1(0.2)     |
| <b>SampEn</b>                | 1.3(0.4)     | 1.2(0.2)     |

R-R interval - The mean of RR intervals, SDNN – Standard deviation of RR intervals, LF – Low frequency, HF – High frequency, RPmax - Maximum line length of diagonal lines in recurrence plot, RPrec - Recurrence rate (percentage of recurrence points in recurrence plot), RPdet - Determinism (percentage of recurrence points which form diagonal lines in recurrence plot), RPshen - Shannon entropy of diagonal line lengths' probability distribution,  $\alpha 1$  - Short-term fluctuations of detrended fluctuation analysis, SampEn - Sample entropy.
